# Supplementary material for: The impact of SOCS1 mutations in diffuse large B‐cell lymphoma
Source: PubMed Central journal article supplement — Br J Haematol. 2019 Aug 12;187(5):627–37. doi: 10.1111/bjh.16147 (PMC6899586; doi:10.1111/bjh.16147), 2019-08-12
Supplement: BJH-187-627-s001.pdf [file BJH-187-627-s001.pdf]

# Supplementary Data

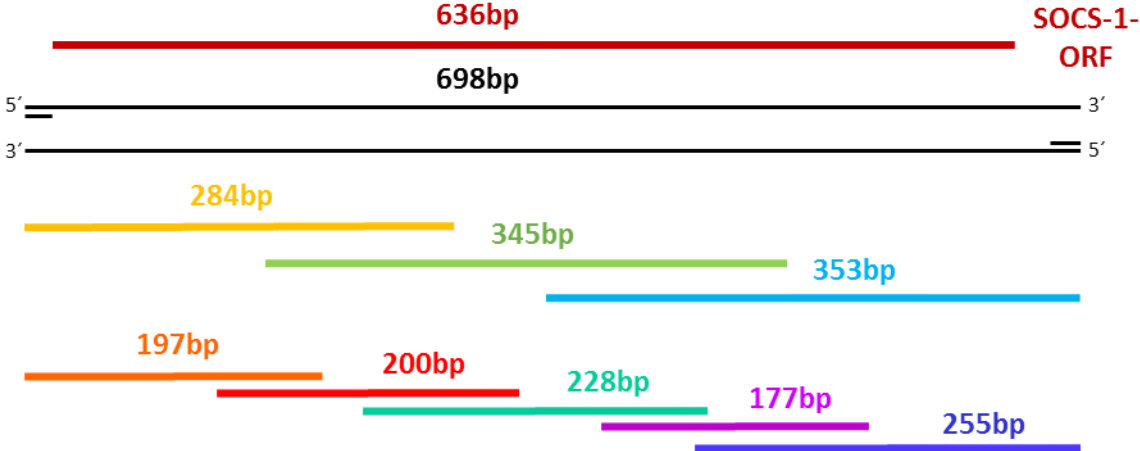

**Supplementary Figure 1:** Schematic position and length of amplicons used to cover the SOCS1 open reading frame.

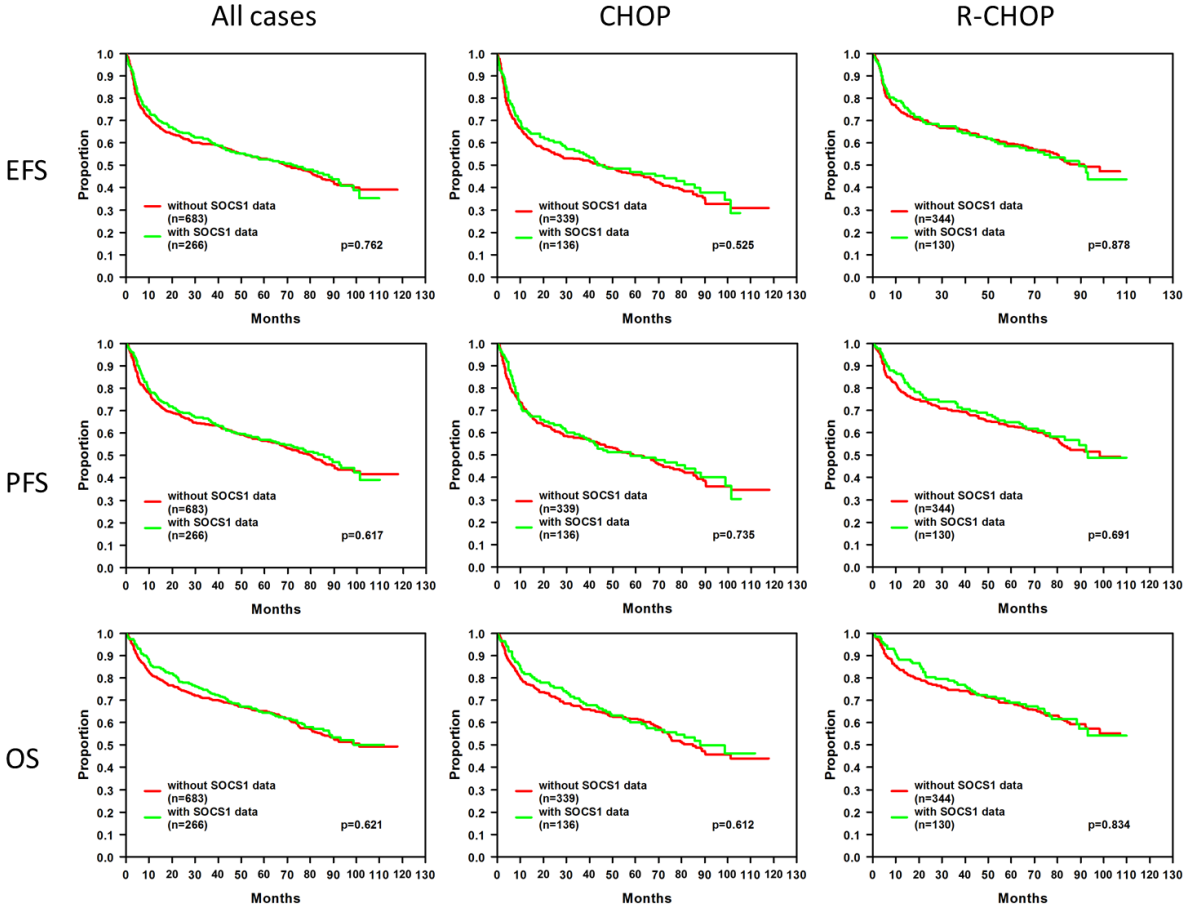

**Supplementary Figure 2:** The subgroup examined represents the whole RICOVER-60 cohort. The survival time analyses of the patients of the RICOVER-60 trial are shown with (green) or without (red) *SOCS1* mutation data with respect to all cases (A) or the patients' treatment (B: CHOP-treated; C: R-CHOP-treated). The analyses were conducted for event-free survival (EFS), progression-free survival (PFS), and overall survival (OS). The corresponding numbers of patients (n) and results of statistical testing for differences (p) are shown. No significant differences were detected.

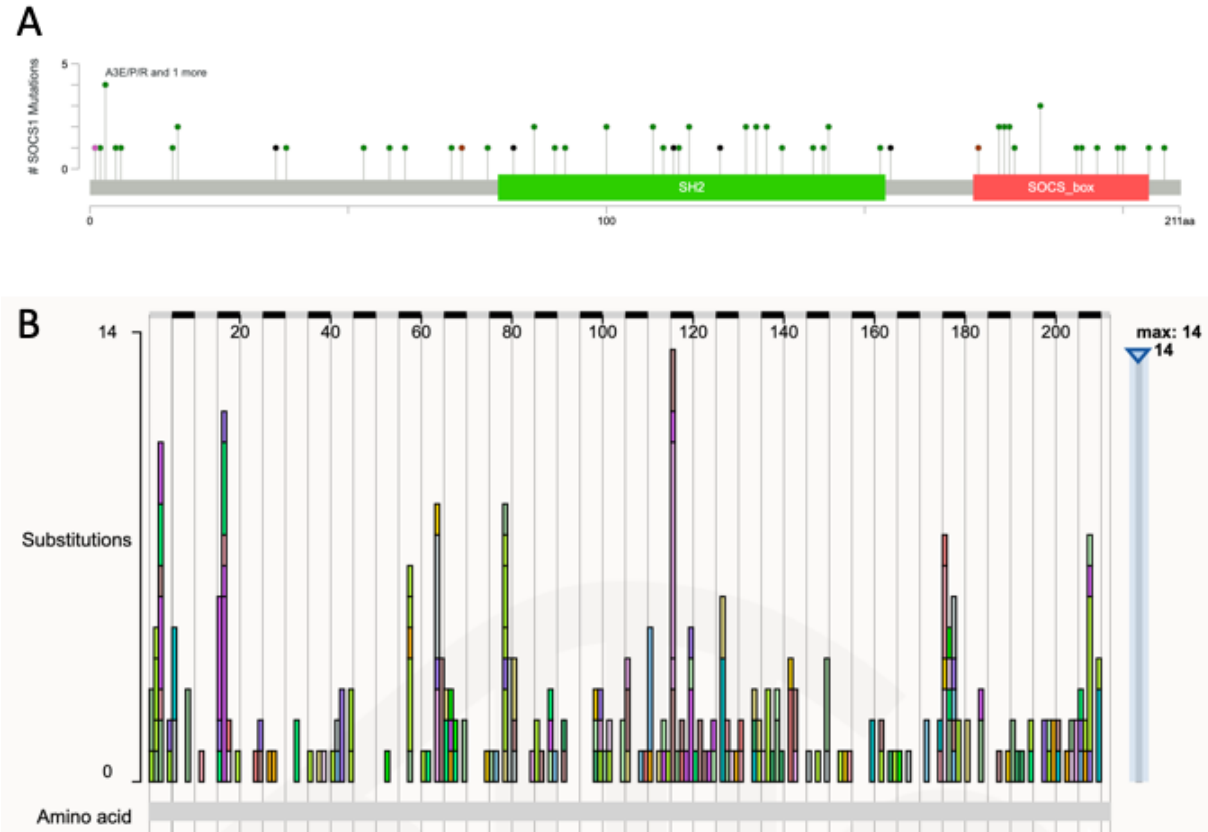

**Supplementary Figure 3:** Comparison of positional accumulation of variants across *SOCS1* using publicly available databases across different cancer types. A. cBioportal, B. COSMIC.

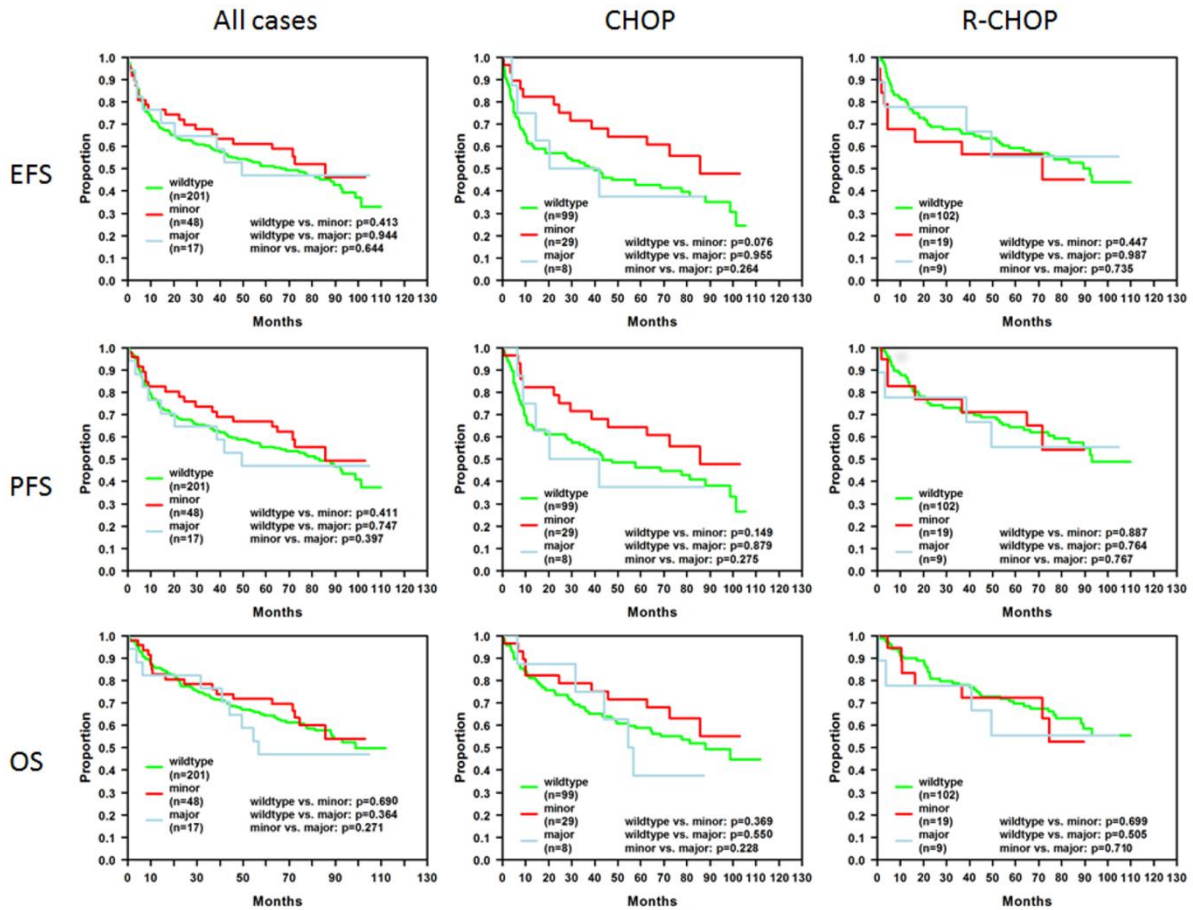

**Supplementary Figure 4:** Survival curves of DLBCL patients related to SOCS1 mutation subtypes. The survival time analyses of the patients of the RICOVER 60 trial are shown with wildtype (green), minor mutated (red), or major mutated (light blue) SOCS1 with respect to all cases (A) or patient treatments (B: CHOP-treated; C: R-CHOP-treated). The analyses were conducted for event-free survival (EFS), progression-free survival (PFS), and overall survival (OS). The corresponding numbers of patients (n) and results of statistical testing for differences (p) are shown. No significant differences were detected.

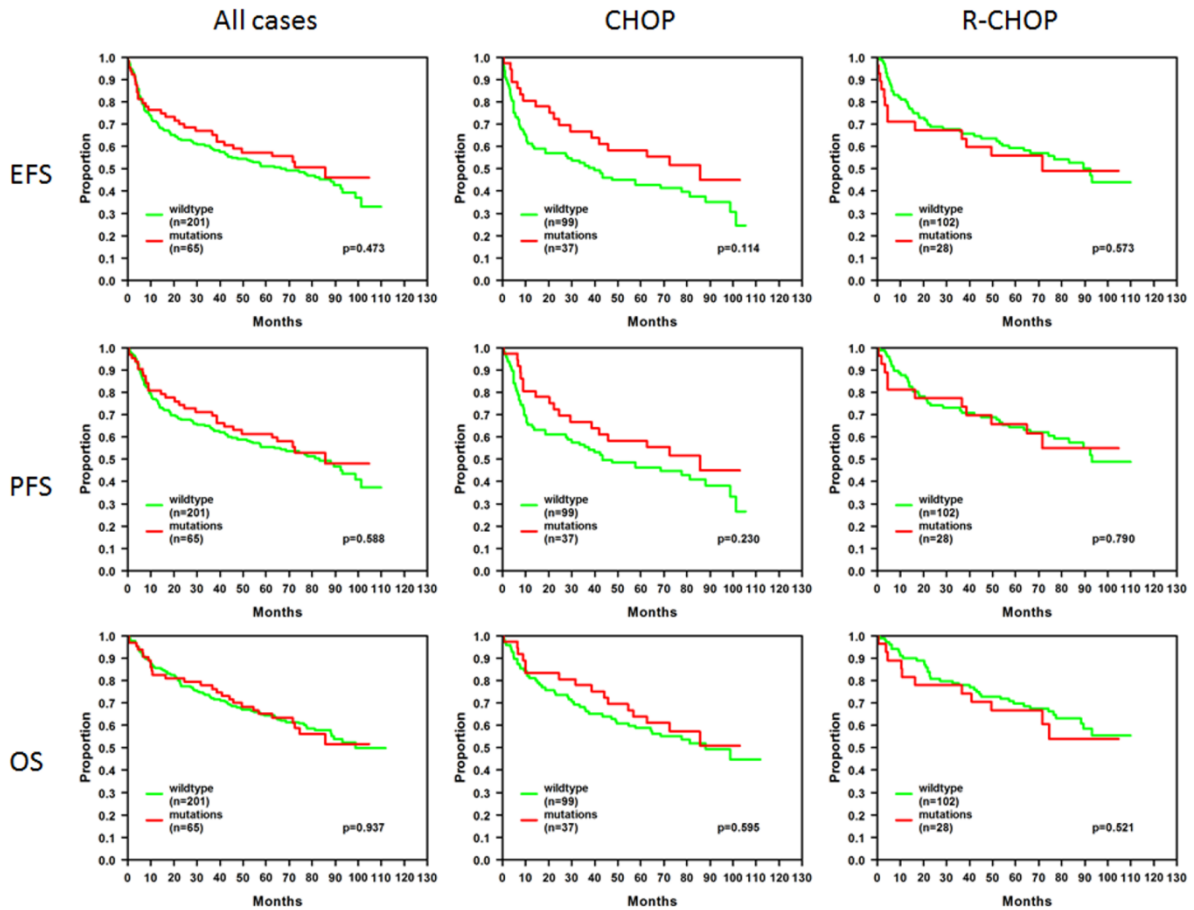

**Supplementary Figure 5:** Survival of DLBCL patients related to overall SOCS1 mutations. The survival time analyses of the patients of the RICOVER 60 trial are shown with wildtype (green) or mutated (red) SOCS-1 with respect to all cases (A) or patient treatments (B: CHOP-treated; C: R-CHOP-treated). The analyses were calculated for event-free survival (EFS), progression-free survival (PFS), and overall survival (OS). The corresponding numbers of patients (n) and results of statistical testing for differences (p) are shown. No significant differences were detected

**Supplementary Table 1:** Primer sequences of PCR primers used to cover the *SOCS1* open reading frame. Either 3 longer (L) or 5 shorter amplicons (S) were used. Primers were named as follows: numbers indicate the amplicon counted from 3' to 5'. L or S indicates a long or a short amplicon. f= forward primer, r= reverse revers primer.

| <b>Primer</b>    | <b>Sequence 5'-3'</b>   |
|------------------|-------------------------|
| <b>1Lf = 1Sf</b> | GGCTGGCCCCCTTCTGTAG     |
| <b>1Lr = 2Sr</b> | CCCCGTGCACGCTCA         |
| <b>2Lf = 3Sf</b> | GCACTTCCGCACATTCCGTT    |
| <b>2Lr = 4Sr</b> | TGGCGCAGCGGGGCCCCCAGCAT |
| <b>3Lf = 4Sf</b> | GAAGTCTTTTTTCGCCCTTA    |
| <b>3Lr = 5Sr</b> | ACGGCATCCCAGTTAATGCT    |
| <b>1Sr</b>       | AACGGAATGTGCGGAAGTGC    |
| <b>2Sf</b>       | TTCCTCCTCTTCCTCCT       |
| <b>3Sr</b>       | GAAGAGGCAGTCGAAGCTCT    |
| <b>5Sf</b>       | AGAGCTTCGACTGCCTCTTC    |

**Supplementary Table 2:** A: Summary of patient characteristics, immunohistochemistry and fluorescence in situ hybridization data. Grouping of the patients with respect to the *SOCS1* mutation status, three different classifiers and the treatment with or without rituximab. No significant differences were found. B: Immunohistochemical detection of characteristic markers in DLBCL and FISH analyses. Patients were grouped into patients with neutral and patients with pathogenic *SOCS1* mutations. Grouping of the patients with respect to the *SOCS1* mutation status, three different classifiers and the treatment with or without rituximab. Significant differences were detected in the expressions of HLADR independently from the specific *SOCS1* mutation classifier. No further differences could be detected.



| <b>B</b>                  | wildtype<br>(n=163) | minor<br>(n=37) | major<br>(n=14) | p-value       | wildtype<br>(n=163) | mutations<br>(n=51) | p-value       | putative neutral<br>(n=184) | putative defect<br>(n=30) | p-value       |
|---------------------------|---------------------|-----------------|-----------------|---------------|---------------------|---------------------|---------------|-----------------------------|---------------------------|---------------|
| <b>Morphology:</b>        |                     |                 |                 |               |                     |                     |               |                             |                           |               |
| Immunoblastic             | 15 (12%)            | 1 (4%)          | 0 (0%)          | 0.508         | 15 (12%)            | 1 (3%)              | 0.196         | 16 (12%)                    | 0 (0%)                    | 0.131         |
| Centroblastic             | 113 (88%)           | 24 (96%)        | 9 (100%)        |               | 113 (88%)           | 33 (97%)            |               | 123 (89%)                   | 23 (100%)                 |               |
| <b>IHC:</b>               |                     |                 |                 |               |                     |                     |               |                             |                           |               |
| BCL2 (51-100%)            | 102/152 (67%)       | 23/34 (68%)     | 7/14 (50%)      | 0.445         | 102/152 (67%)       | 30/48 (63%)         | 0.557         | 114/173 (66%)               | 18/27 (67%)               | 0.937         |
| BCL6 (26-100%)            | 109/138 (79%)       | 28/33 (85%)     | 13/13 (100%)    | 0.153         | 109/138 (79%)       | 41/46 (89%)         | 0.125         | 124/156 (80%)               | 26/28 (93%)               | 0.093         |
| MYC (41-100%)             | 32/123 (26%)        | 10/29 (35%)     | 3/10 (30%)      | 0.629         | 32/123 (26%)        | 13/39 (33%)         | 0.374         | 35/139 (25%)                | 10/23 (44%)               | 0.070         |
| CD5 (1-100%)              | 10/145 (7%)         | 2/34 (6%)       | 1/14 (7%)       | 1.000         | 10/145 (7%)         | 3/48 (6%)           | 1.000         | 11/166 (7%)                 | 2/27 (7%)                 | 1.000         |
| CD10 (1-100%)             | 51/149 (34%)        | 11/34 (32%)     | 3/14 (21%)      | 0.693         | 51/149 (34%)        | 14/48 (29%)         | 0.517         | 55/169 (33%)                | 10/28 (36%)               | 0.741         |
| HLADR (1-100%)            | 135/151 (89%)       | 25/34 (74%)     | 9/13 (69%)      | 0.015         | 135/151 (89%)       | 34/47 (72%)         | 0.004         | 150/171 (88%)               | 19/27 (70%)               | 0.035         |
| MUM1 (5-100%)             | 123/146 (84%)       | 29/34 (85%)     | 10/12 (83%)     | 1.000         | 123/146 (84%)       | 39/46 (85%)         | 0.930         | 141/167 (84%)               | 21/25 (84%)               | 1.000         |
| Ki67 (76-100%)            | 101/142 (71%)       | 22/34 (65%)     | 9/12 (75%)      | 0.773         | 101/142 (71%)       | 31/46 (67%)         | 0.630         | 117/163 (72%)               | 15/25 (60%)               | 0.230         |
| MYC+/BCL2+                | 24/106 (23%)        | 9/25 (36%)      | 1/8 (13%)       | 0.334         | 24/106 (23%)        | 10/33 (30%)         | 0.371         | 26/119 (22%)                | 8/20 (40%)                | 0.095         |
| <b>FISH:</b>              |                     |                 |                 |               |                     |                     |               |                             |                           |               |
| BCL2 positive             | 18/149 (12%)        | 7/33 (21%)      | 2/12 (17%)      | 0.276         | 18/149 (12%)        | 9/45 (20%)          | 0.179         | 21/169 (12%)                | 6/25 (24%)                | 0.127         |
| BCL6 positive             | 52/152 (34%)        | 9/34 (27%)      | 4/12 (33%)      | 0.700         | 52/152 (34%)        | 13/46 (28%)         | 0.452         | 57/172 (33%)                | 8/26 (31%)                | 0.810         |
| MYC positive              | 12/150 (8%)         | 2/34 (6%)       | 1/13 (8%)       | 1.000         | 12/150 (8%)         | 3/47 (6%)           | 1.000         | 13/171 (8%)                 | 2/26 (8%)                 | 1.000         |
| IGH positive              | 37/90 (41%)         | 6/12 (50%)      | 2/8 (25%)       | 0.606         | 37/90 (41%)         | 8/20 (40%)          | 0.927         | 41/97 (42%)                 | 4/13 (31%)                | 0.428         |
| MYC+/BCL2+                | 2/116 (2%)          | 2/23 (9%)       | 0/8 (0%)        | 0.196         | 2/116 (2%)          | 2/31 (7%)           | 0.196         | 3/130 (2%)                  | 1/17 (6%)                 | 0.392         |
| MYC+/BCL6+                | 1/115 (1%)          | 0/25 (0%)       | 0/8 (0%)        | 1.000         | 1/115 (1%)          | 0/33 (0%)           | 1.000         | 1/129 (1%)                  | 0/19 (0%)                 | 1.000         |
| BCL2+/BCL6+               | 4/115 (4%)          | 1/24 (4%)       | 0/7 (0%)        | 1.000         | 4/115 (4%)          | 1/31 (3%)           | 1.000         | 4/128 (3%)                  | 1/18 (6%)                 | 0.487         |
| MYC+/BCL2+/BCL6+          | 0/110 (0%)          | 0/22 (0%)       | 0/7 (0%)        | -             | 0/110 (0%)          | 0/29 (0%)           | -             | 0/123 (0%)                  | 0/16 (0%)                 | -             |
| <b>Hans classifier:</b>   |                     |                 |                 |               |                     |                     |               |                             |                           |               |
| ABC                       | 78/136 (57%)        | 17/32 (53%)     | 7/11 (64%)      | 0.824         | 78/136 (57%)        | 24/43 (56%)         | 0.859         | 90/154 (58%)                | 12/25 (48%)               | 0.328         |
| GCB                       | 58/136 (43%)        | 15/32 (47%)     | 4/11 (36%)      |               | 58/136 (43%)        | 19/43 (44%)         |               | 64/154 (42%)                | 13/25 (52%)               |               |
| <b>Lymph 2Cx***:</b>      |                     |                 |                 |               |                     |                     |               |                             |                           |               |
| ABC                       | 65/140 (46%)        | 14/34 (41%)     | 5/10 (50%)      | 0.800         | 65/140 (46%)        | 19/44 (43%)         | 0.731         | 74/158 (47%)                | 10/26 (39%)               | 0.527         |
| GCB                       | 59/140 (42%)        | 15/34 (44%)     | 3/10 (30%)      | (global)      | 59/140 (42%)        | 18/44 (41%)         | (global)      | 66/158 (42%)                | 11/26 (42%)               | (global)      |
| intermediate/unclassified | 16/140 (11%)        | 5/34 (15%)      | 2/10 (20%)      | 0.832         | 16/140 (11%)        | 7/44 (16%)          | 0.909         | 18/158 (11%)                | 5/26 (19%)                | 0.654         |
|                           |                     |                 |                 | (ABC vs. GCB) |                     |                     | (ABC vs. GCB) |                             |                           | (ABC vs. GCB) |
| <b>IHC-score**:</b>       |                     |                 |                 |               |                     |                     |               |                             |                           |               |
| 0, 1                      | 75/119 (63%)        | 14/27 (52%)     | 8/10 (80%)      | 0.287         | 75/119 (63%)        | 22/37 (60%)         | 0.696         | 84/133 (63%)                | 13/23 (57%)               | 0.545         |
| 2, 3                      | 44/119 (37%)        | 13/27 (48%)     | 2/10 (20%)      |               | 44/119 (37%)        | 15/37 (41%)         |               | 49/133 (37%)                | 10/23 (44%)               |               |
| <b>FISH/IHC-score**:</b>  |                     |                 |                 |               |                     |                     |               |                             |                           |               |
| 0, 1                      | 68/113 (60%)        | 12/24 (50%)     | 8/9 (89%)       | 0.130         | 68/113 (60%)        | 20/33 (61%)         | 0.965         | 76/127 (60%)                | 12/19 (63%)               | 0.783         |
| 2, 3, 4                   | 45/113 (40%)        | 12/24 (50%)     | 1/9 (11%)       |               | 45/113 (40%)        | 13/33 (39%)         |               | 51/127 (40%)                | 7/19 (37%)                |               |
| <b>P53 (26-100%)</b>      |                     |                 |                 |               |                     |                     |               |                             |                           |               |
| P53 mutated               | 26/146 (18%)        | 5/36 (14%)      | 0/12 (0%)       | 0.332         | 26/146 (18%)        | 5/48 (10%)          | 0.225         | 27/166 (16%)                | 4/28 (14%)                | 1.000         |
|                           | 28/109 (26%)        | 5/18 (28%)      | 2/8 (25%)       | 1.000         | 28/109 (26%)        | 7/26 (27%)          | 0.897         | 30/120 (25%)                | 5/15 (33%)                | 0.535         |

\* sample according to Horn et al. Blood 2013 with SOCS1 data

\*\* Horn et al. Blood 2013

\*\*\* sample according to Staiger et al. JCO 2017 submitted/review with SOCS1 data
